# Supplementary material for: The statistical fusion identification of dairy products based on extracted Raman spectroscopy
Source: Royal Society of Chemistry journal article supplement (doi:10.1039/d0ra06318e), 2020-01-01
Supplement: d0ra06318e1.pdf [file d0ra06318e1.pdf]

## Supplementary Information

### Statistical fusion identification of dairy products based on extracted Raman spectroscopy

Zheng-Yong Zhang<sup>1,2\*</sup>

<sup>1</sup> State Key Laboratory of Dairy Biotechnology, Shanghai Engineering Research Center of Dairy Biotechnology, Dairy Research Institute, Bright Dairy & Food Co., Ltd., Shanghai 200436, The People's Republic of China

<sup>2</sup> School of Management Science and Engineering, Nanjing University of Finance and Economics, Nanjing Jiangsu 210023, The People's Republic of China

\*Correspondence to Prof. Zheng-Yong Zhang. E-mail: zyzhang@nufe.edu.cn

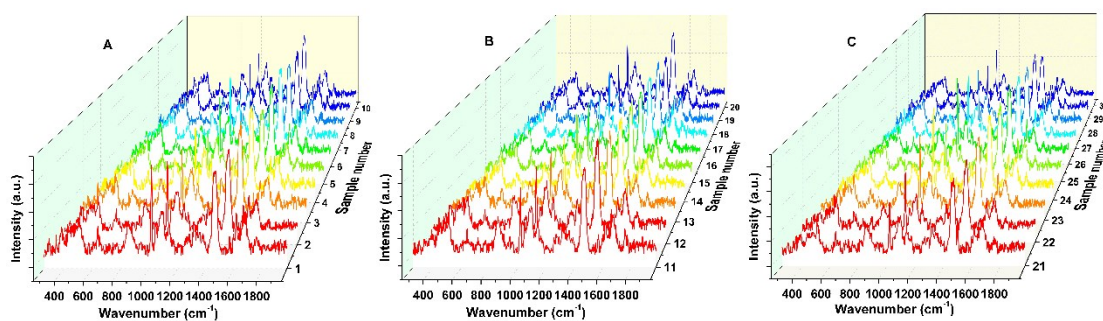

**Figure S1** Raman spectra of momchilovtsi pasteurized heat-treated flavor yoghurt products from Bright Dairy & Food Co., Ltd. (A) sample number 1-10, (B) sample number 11-20, and (C) sample number 21-30.

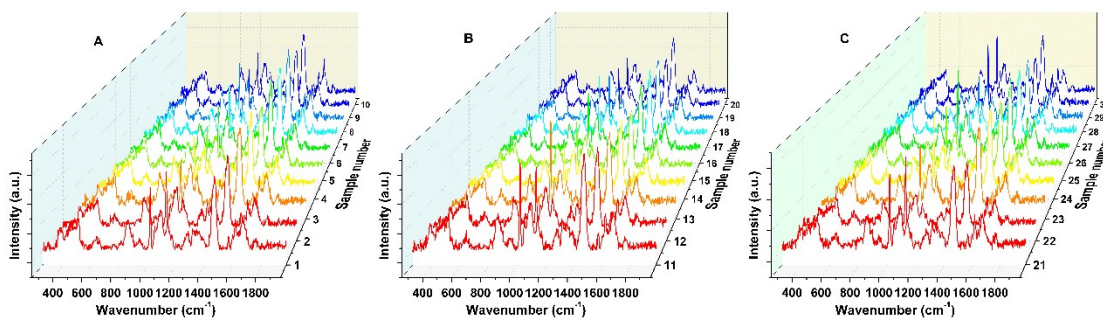

**Figure S2** Raman spectra of ambpoeial pasteurized heat-treated flavor yoghurt products from Inner Mongolia Yili Industrial Group Co., Ltd. (A) sample number 1-

10, (B) sample number 11-20, and (C) sample number 21-30.

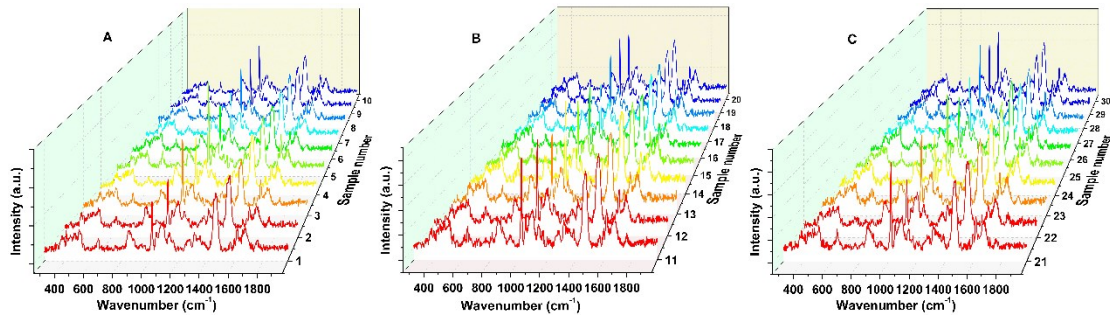

**Figure S3** Raman spectra of ChunZhen pasteurized heat-treated flavor yoghurt products from Mengniu Dairy Group Co. Ltd. (A) sample number 1-10, (B) sample number 11-20, and (C) sample number 21-30.

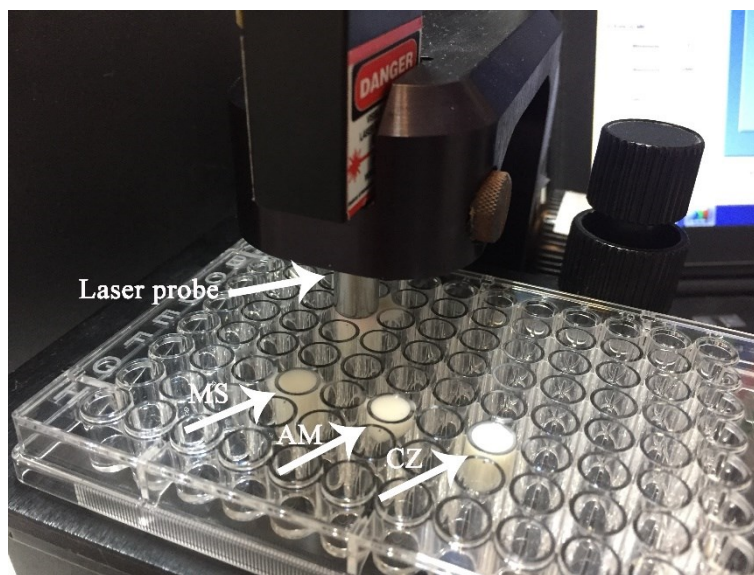

**Figure S4** Schematic diagram of test and sample.

(MS represents the momchilovtsi pasteurized heat-treated flavor yoghurt products from Bright Dairy & Food Co., Ltd. AM represents the ambpoelial pasteurized heat-treated flavor yoghurt products from Inner Mongolia Yili Industrial Group Co., Ltd. CZ represents the ChunZhen pasteurized heat-treated flavor yoghurt products from Mengniu Dairy Group Co. Ltd.)

The statistical control chart can be realized using the following individual and moving range chart formulae. For the individual ( $x$ ) control chart, the formula is as follows<sup>1</sup>:

$$UCL_x = \bar{x} + 2.66\overline{MR}$$

$$CL_x = \bar{x}$$

$$LCL_x = \bar{x} - 2.66\overline{MR}$$

For the moving range (MR) control chart, the formula is as follows:

$$UCL_{MR} = 3.267\overline{MR}$$

$$CL_{MR} = \overline{MR}$$

$$LCL_{MR} = 0$$

In the formulae,  $x$  and  $\bar{x}$  represent the Raman intensity and the average value of the samples, respectively;  $MR$  represents the moving range, which is  $MR = |x_{i+1} - x_i|$ ;  $x_i$  represents the Raman intensity of the sample  $i$  variable, and  $i$  changes from 1 to 29 in steps of 1 in this work. UCL = upper control limit; LCL = lower control limit;  $\overline{MR}$  = the average value of moving range control chart.

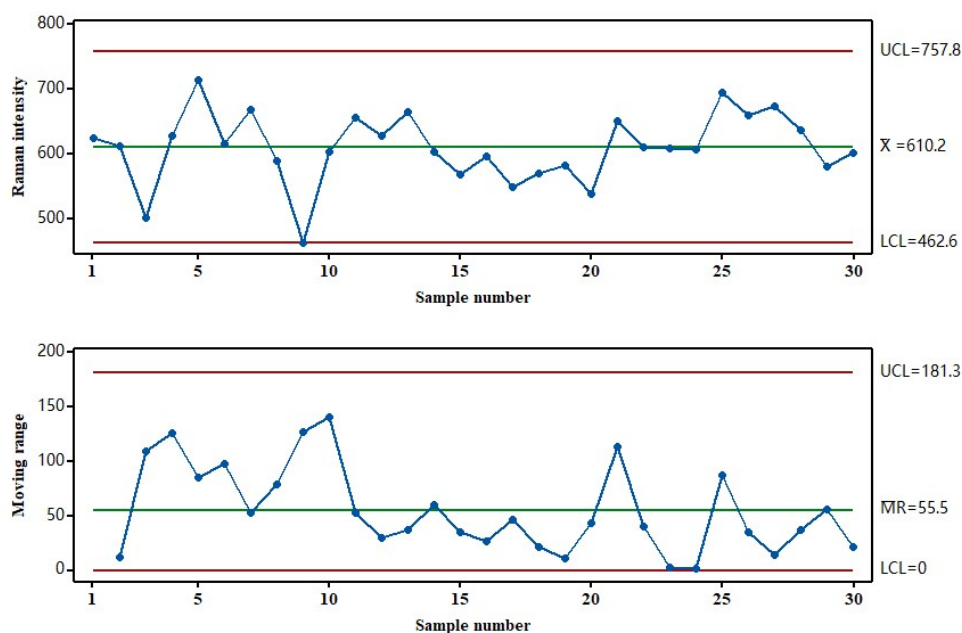

**Figure S5** Quality fluctuation individual value chart (A) and moving range chart (B) of MS based on Raman peak intensities (at 1468  $\text{cm}^{-1}$ ).

(UCL represents upper control limit; LCL represents lower control limit;  $\overline{MR}$  represents the average value of moving range control chart. MS represents the momchilovtsi pasteurized heat-treated flavor yoghurt products from Bright Dairy & Food Co., Ltd.)

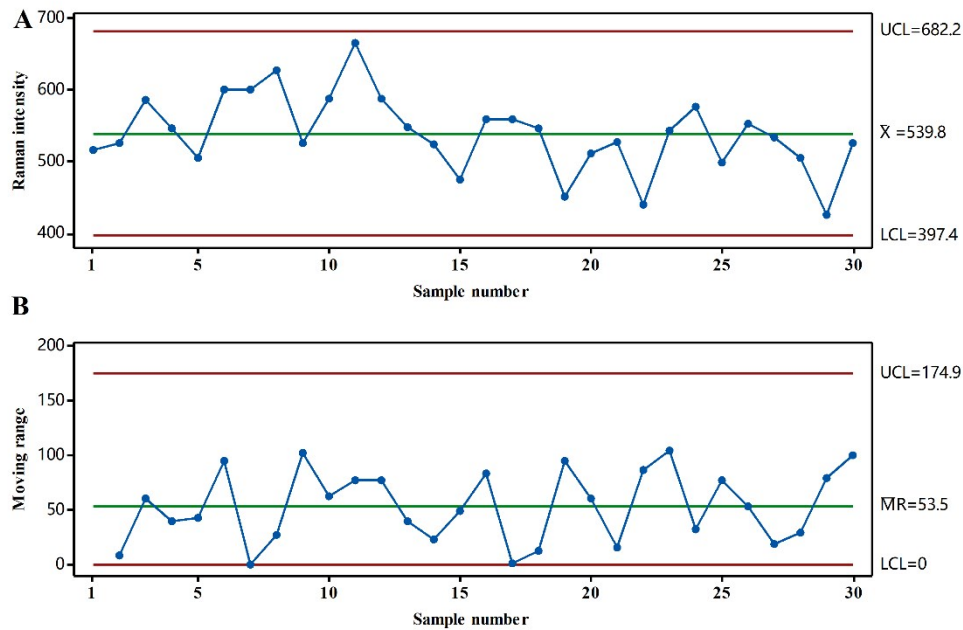

**Figure S6** Quality fluctuation individual value chart (A) and moving range chart (B) of AM based on Raman peak intensities (at  $1468\text{ cm}^{-1}$ ).

(UCL represents upper control limit; LCL represents lower control limit;  $\overline{MR}$  represents the average value of moving range control chart. AM represents the ambpoeial pasteurized heat-treated flavor yoghurt products from Inner Mongolia Yili Industrial Group Co., Ltd.)

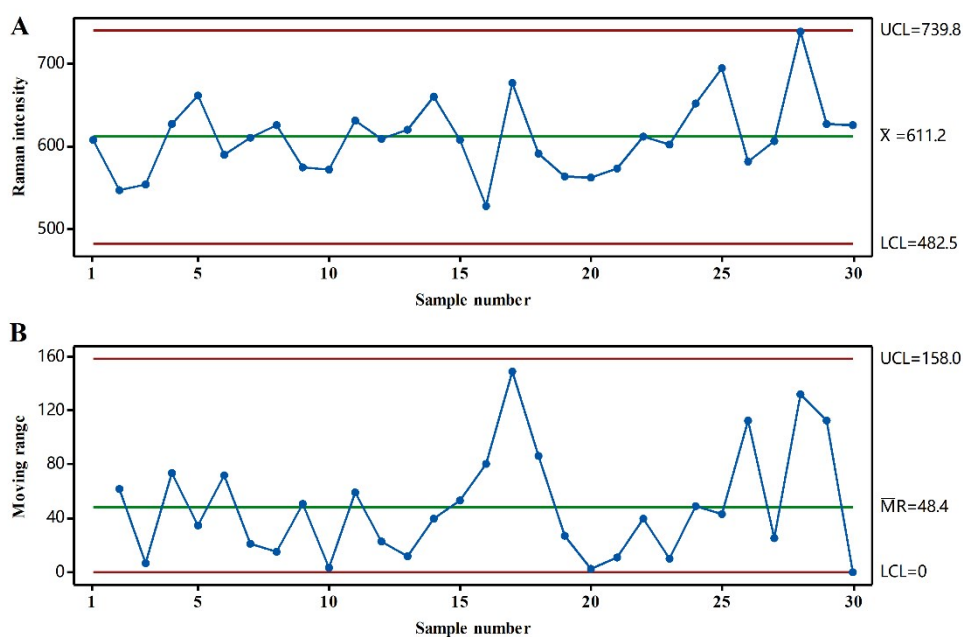

**Figure S7** Quality fluctuation individual value chart (A) and moving range chart (B) of CZ based on Raman peak intensities (at 1468 cm<sup>-1</sup>).

(UCL represents upper control limit; LCL represents lower control limit;  $\overline{MR}$  represents the average value of moving range control chart. CZ represents the ChunZhen pasteurized heat-treated flavor yoghurt products from Mengniu Dairy Group Co. Ltd.)

**Table S1** Composition content of dairy products

| Chemical composition | MS         | AM         | CZ         |
|----------------------|------------|------------|------------|
| Protein              | 2.8g/100g  | 3.1g/100g  | 2.8g/100g  |
| Fat                  | 3.0g/100g  | 3.1g/100g  | 3.2g/100g  |
| Sugar                | 12.5g/100g | 13.0g/100g | 12.5g/100g |

(MS represents the momchilovtsi pasteurized heat-treated flavor yoghurt products from Bright Dairy & Food Co., Ltd. AM represents the ambpoeial pasteurized heat-treated flavor yoghurt products from Inner Mongolia Yili Industrial Group Co., Ltd. CZ represents the ChunZhen pasteurized heat-treated flavor yoghurt products from Mengniu Dairy Group Co. Ltd.)

**Table S2** The identification results of dairy products based on their Raman spectroscopy and SVM recognition algorithm (window interval 20 cm<sup>-1</sup>).

| The range of Raman spectroscopy (cm <sup>-1</sup> ) | Accuracy rate (%) | The range of Raman spectroscopy (cm <sup>-1</sup> ) | Accuracy rate (%) |
|-----------------------------------------------------|-------------------|-----------------------------------------------------|-------------------|
| 255-274                                             | 42                | 1115-1134                                           | 48                |
| 275-294                                             | 57                | 1135-1154                                           | 49                |
| 295-314                                             | 46                | 1155-1174                                           | 44                |
| 315-334                                             | 47                | 1175-1194                                           | 55                |
| 335-354                                             | 56                | 1195-1214                                           | 54                |
| 355-374                                             | 39                | 1215-1234                                           | 46                |
| 375-394                                             | 36                | 1235-1254                                           | 54                |
| 395-414                                             | 43                | 1255-1274                                           | 44                |
| 415-434                                             | 48                | 1275-1294                                           | 46                |
| 435-454                                             | 54                | 1295-1314                                           | 64                |
| 455-474                                             | 46                | 1315-1334                                           | 53                |
| 475-494                                             | 44                | 1335-1354                                           | 41                |
| 495-514                                             | 52                | 1355-1374                                           | 43                |
| 515-534                                             | 55                | 1375-1394                                           | 43                |
| 535-554                                             | 44                | 1395-1414                                           | 37                |
| 555-574                                             | 35                | 1415-1434                                           | 49                |
| 575-594                                             | 42                | 1435-1454                                           | 47                |
| 595-614                                             | 50                | 1455-1474                                           | 51                |
| 615-634                                             | 55                | 1475-1494                                           | 49                |
| 635-654                                             | 62                | 1495-1514                                           | 58                |
| 655-674                                             | 42                | 1515-1534                                           | 58                |
| 675-694                                             | 54                | 1535-1554                                           | 50                |
| 695-714                                             | 56                | 1555-1574                                           | 52                |
| 715-734                                             | 42                | 1575-1594                                           | 66                |
| 735-754                                             | 50                | 1595-1614                                           | 53                |
| 755-774                                             | 57                | 1615-1634                                           | 58                |
| 775-794                                             | 51                | 1635-1654                                           | 56                |
| 795-814                                             | 47                | 1655-1674                                           | 49                |
| 815-834                                             | 58                | 1675-1694                                           | 49                |
| 835-854                                             | 47                | 1695-1714                                           | 56                |
| 855-874                                             | 43                | 1715-1734                                           | 47                |
| 875-894                                             | 45                | 1735-1754                                           | 53                |
| 895-914                                             | 52                | <b>1755-1774</b>                                    | <b>69</b>         |
| 915-934                                             | 50                | 1775-1794                                           | 43                |
| 935-954                                             | 47                | 1795-1814                                           | 60                |
| 955-974                                             | 49                | 1815-1834                                           | 54                |
| 975-994                                             | 50                | 1835-1854                                           | 63                |
| 995-1014                                            | 47                | 1855-1874                                           | 60                |

|           |    |           |    |
|-----------|----|-----------|----|
| 1015-1034 | 62 | 1875-1894 | 60 |
| 1035-1054 | 57 | 1895-1914 | 60 |
| 1055-1074 | 48 | 1915-1934 | 56 |
| 1075-1094 | 37 | 1935-1954 | 57 |
| 1095-1114 | 51 | 1955-1974 | 55 |

**Table S3** The identification results of dairy products based on their Raman spectroscopy and SVM recognition algorithm (Raman band scanning).

| The range of Raman spectroscopy (cm <sup>-1</sup> ) | Accuracy rate (%) | The range of Raman spectroscopy (cm <sup>-1</sup> ) | Accuracy rate (%) |
|-----------------------------------------------------|-------------------|-----------------------------------------------------|-------------------|
| 350-405                                             | 35                | 1155-1185                                           | 51                |
| 485-540                                             | 61                | 1185-1230                                           | 50                |
| 590-670                                             | 47                | 1230-1300                                           | 52                |
| 780-820                                             | 52                | 1300-1415                                           | 59                |
| 820-915                                             | 57                | 1415-1520                                           | 55                |
| 915-985                                             | 44                | 1550-1580                                           | 55                |
| 985-1030                                            | 56                | 1580-1605                                           | 62                |
| 1030-1060                                           | 53                | 1605-1640                                           | 59                |
| 1060-1115                                           | 41                | 1640-1730                                           | 49                |
| 1115-1155                                           | 41                | 1730-1800                                           | 57                |

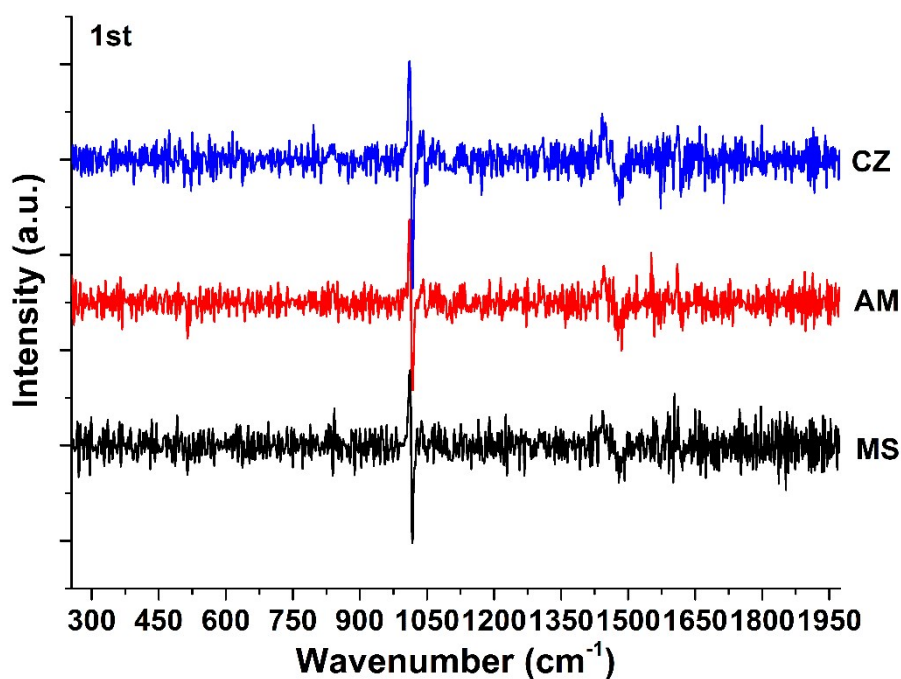

**Figure S8** Raman spectra of different dairy products after first order derivative

processing.

(MS represents the momchilovtsi pasteurized heat-treated flavor yoghurt products from Bright Dairy & Food Co., Ltd. AM represents the ambpoeial pasteurized heat-treated flavor yoghurt products from Inner Mongolia Yili Industrial Group Co., Ltd. CZ represents the ChunZhen pasteurized heat-treated flavor yoghurt products from Mengniu Dairy Group Co. Ltd.)

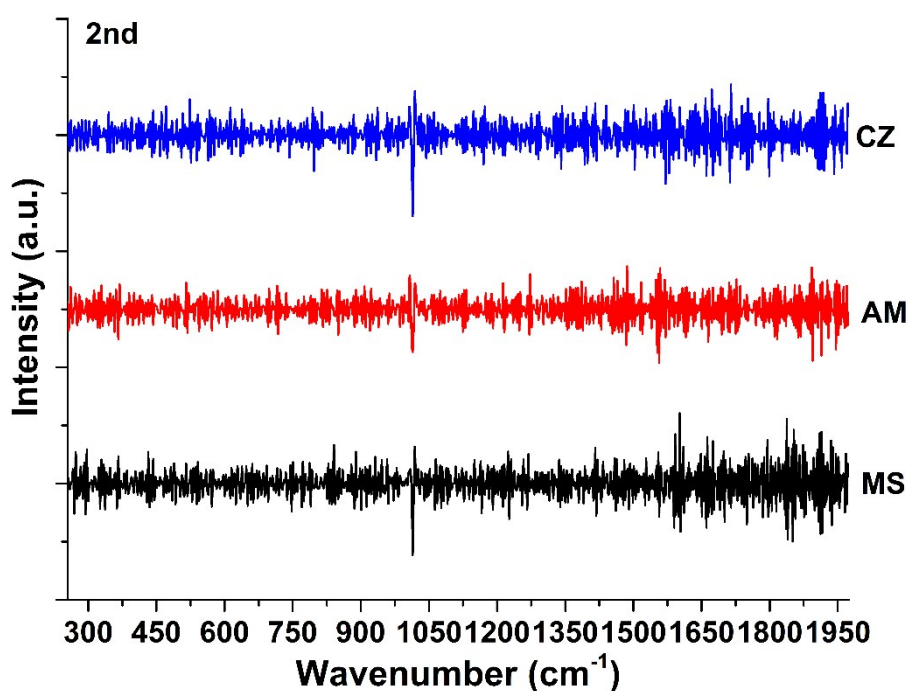

**Figure S9** Raman spectra of different dairy products after second order derivative processing.

(MS represents the momchilovtsi pasteurized heat-treated flavor yoghurt products from Bright Dairy & Food Co., Ltd. AM represents the ambpoeial pasteurized heat-treated flavor yoghurt products from Inner Mongolia Yili Industrial Group Co., Ltd. CZ represents the ChunZhen pasteurized heat-treated flavor yoghurt products from Mengniu Dairy Group Co. Ltd.)



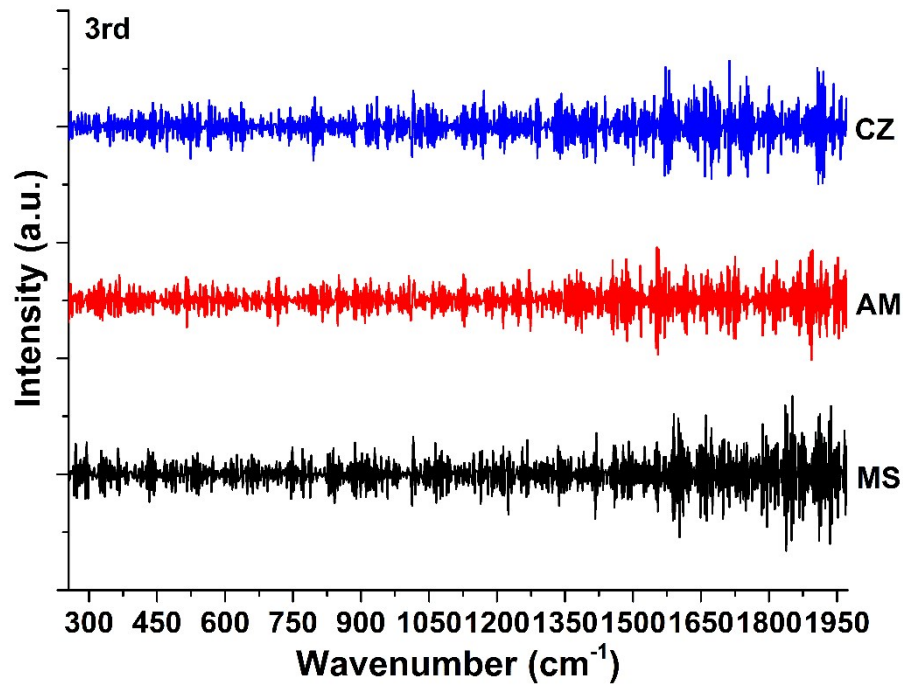

**Figure S10** Raman spectra of different dairy products after third order derivative processing.

(MS represents the momchilovtsi pasteurized heat-treated flavor yoghurt products from Bright Dairy & Food Co., Ltd. AM represents the ambpoeial pasteurized heat-treated flavor yoghurt products from Inner Mongolia Yili Industrial Group Co., Ltd. CZ represents the ChunZhen pasteurized heat-treated flavor yoghurt products from Mengniu Dairy Group Co. Ltd.)

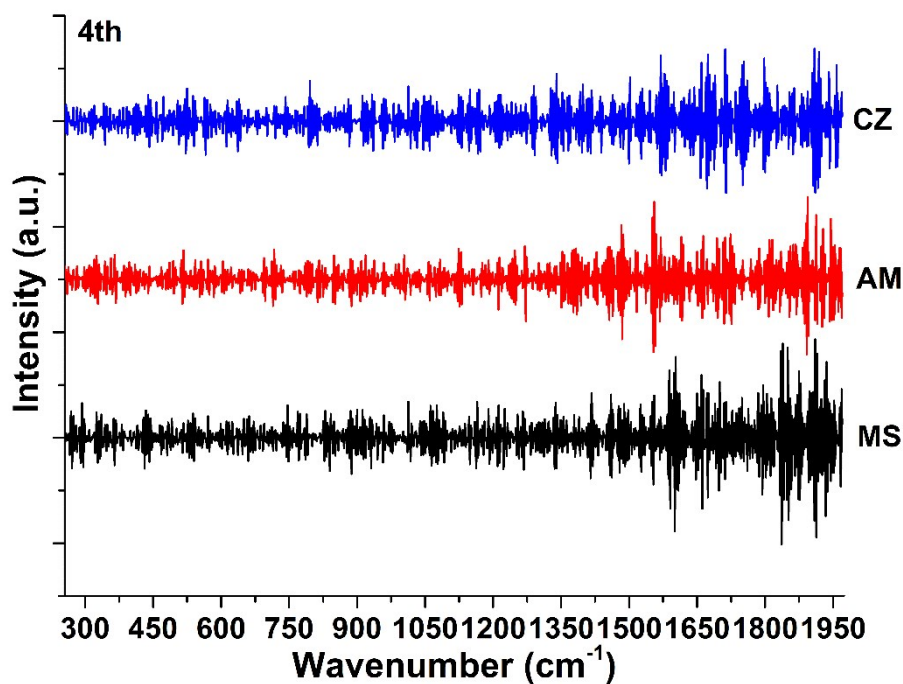

**Figure S11** Raman spectra of different dairy products after fourth order derivative processing.

(MS represents the momchilovtsi pasteurized heat-treated flavor yoghurt products from Bright Dairy & Food Co., Ltd. AM represents the ambpoeial pasteurized heat-treated flavor yoghurt products from Inner Mongolia Yili Industrial Group Co., Ltd. CZ represents the ChunZhen pasteurized heat-treated flavor yoghurt products from Mengniu Dairy Group Co. Ltd.)

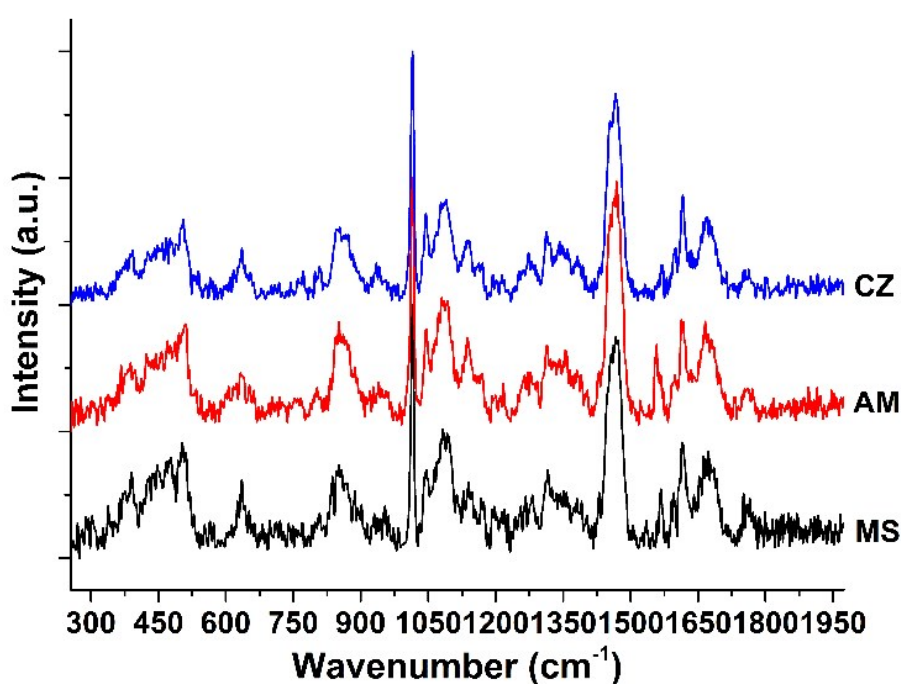

**Figure S12** Raman spectra of different dairy products after normalization.

(MS represents the momchilovtsi pasteurized heat-treated flavor yoghurt products from Bright Dairy & Food Co., Ltd. AM represents the ambpoeial pasteurized heat-treated flavor yoghurt products from Inner Mongolia Yili Industrial Group Co., Ltd. CZ represents the ChunZhen pasteurized heat-treated flavor yoghurt products from Mengniu Dairy Group Co. Ltd.)

**Table S4** The identification results of dairy products based on their Raman spectroscopy and SVM recognition algorithm after normalization (window interval 20  $\text{cm}^{-1}$ ).

| The range of Raman spectroscopy ( $\text{cm}^{-1}$ ) | Accuracy rate (%) | The range of Raman spectroscopy ( $\text{cm}^{-1}$ ) | Accuracy rate (%) |
|------------------------------------------------------|-------------------|------------------------------------------------------|-------------------|
| 255-274                                              | 44                | 1115-1134                                            | 61                |
| 275-294                                              | 57                | 1135-1154                                            | 60                |
| 295-314                                              | 53                | 1155-1174                                            | 57                |
| 315-334                                              | 48                | 1175-1194                                            | 55                |
| <b>335-354</b>                                       | <b>71</b>         | 1195-1214                                            | 53                |
| 355-374                                              | 51                | 1215-1234                                            | 41                |
| 375-394                                              | 53                | 1235-1254                                            | 57                |
| 395-414                                              | 57                | 1255-1274                                            | 50                |
| 415-434                                              | 55                | 1275-1294                                            | 60                |
| <b>435-454</b>                                       | <b>71</b>         | 1295-1314                                            | 55                |
| 455-474                                              | 61                | 1315-1334                                            | 60                |
| 475-494                                              | 65                | 1335-1354                                            | 53                |
| 495-514                                              | 57                | 1355-1374                                            | 51                |
| 515-534                                              | 65                | 1375-1394                                            | 51                |
| 535-554                                              | 48                | 1395-1414                                            | 53                |
| 555-574                                              | 46                | 1415-1434                                            | 62                |
| 575-594                                              | 46                | 1435-1454                                            | 62                |
| 595-614                                              | 52                | 1455-1474                                            | 59                |
| 615-634                                              | 61                | 1475-1494                                            | 57                |
| 635-654                                              | 64                | 1495-1514                                            | 57                |
| 655-674                                              | 42                | 1515-1534                                            | 53                |
| 675-694                                              | 40                | 1535-1554                                            | 53                |
| 695-714                                              | 55                | 1555-1574                                            | 69                |
| 715-734                                              | 45                | 1575-1594                                            | 58                |
| 735-754                                              | 51                | 1595-1614                                            | 58                |
| 755-774                                              | 50                | 1615-1634                                            | 64                |
| 775-794                                              | 55                | 1635-1654                                            | 60                |
| 795-814                                              | 43                | 1655-1674                                            | 58                |
| 815-834                                              | 59                | 1675-1694                                            | 63                |
| <b>835-854</b>                                       | <b>75</b>         | 1695-1714                                            | 59                |
| 855-874                                              | 57                | 1715-1734                                            | 48                |
| 875-894                                              | 51                | 1735-1754                                            | 61                |
| 895-914                                              | 49                | 1755-1774                                            | 65                |
| 915-934                                              | 54                | 1775-1794                                            | 49                |
| 935-954                                              | 53                | 1795-1814                                            | 51                |
| 955-974                                              | 50                | 1815-1834                                            | 49                |
| 975-994                                              | 47                | 1835-1854                                            | 49                |

|           |    |           |    |
|-----------|----|-----------|----|
| 995-1014  | 54 | 1855-1874 | 51 |
| 1015-1034 | 53 | 1875-1894 | 63 |
| 1035-1054 | 54 | 1895-1914 | 60 |
| 1055-1074 | 53 | 1915-1934 | 50 |
| 1075-1094 | 52 | 1935-1954 | 50 |
| 1095-1114 | 56 | 1955-1974 | 50 |

**Table S5** The identification results of dairy products based on their Raman spectroscopy and SVM recognition algorithm after normalization (Raman band scanning).

| The range of Raman spectroscopy (cm <sup>-1</sup> ) | Accuracy rate (%) | The range of Raman spectroscopy (cm <sup>-1</sup> ) | Accuracy rate (%) |
|-----------------------------------------------------|-------------------|-----------------------------------------------------|-------------------|
| 350-405                                             | 60                | <b>1155-1185</b>                                    | <b>70</b>         |
| <b>485-540</b>                                      | <b>72</b>         | 1185-1230                                           | 56                |
| 590-670                                             | 66                | 1230-1300                                           | 65                |
| 780-820                                             | 61                | <b>1300-1415</b>                                    | <b>71</b>         |
| <b>820-915</b>                                      | <b>83</b>         | <b>1415-1520</b>                                    | <b>73</b>         |
| 915-985                                             | 62                | 1550-1580                                           | 61                |
| 985-1030                                            | 58                | 1580-1605                                           | 59                |
| 1030-1060                                           | 61                | 1605-1640                                           | 65                |
| 1060-1115                                           | 61                | 1640-1730                                           | 63                |
| 1115-1155                                           | 68                | 1730-1800                                           | 60                |

### References

- 1 D.C. Montgomery, *Introduction to Statistical Quality Control (Sixth Edition)*, John Wiley & Sons, Inc., 2009.
